# Supplementary material for: Associations of Prenatal Exposure to Organophosphate Pesticide Metabolites with Gestational Age and Birth Weight
Source: PubMed Central journal article supplement (PMC3404666; doi:10.1289/ehp.1104615), 2012-04-05
Supplement: ehp.1104615.s001.pdf [file ehp.1104615.s001.pdf]

## **Supplemental Material**

Associations of Prenatal Exposure to Organophosphate  
Pesticide Metabolites with Gestational Age and Birthweight

Stephen A. Rauch, Joe M. Braun, Dana Boyd Barr, Antonia M. Calafat,  
Jane Khoury, M. Angela Montesano, Kimberly Yolton, Bruce P. Lanphear

**Supplemental Material, Table 1.** Mean change in gestational length and birthweight associated with a 10-fold increase in average urinary  $\Sigma$ DAP concentrations, stratified by *PON1* genotypes, and p-values for DAP x *PON1* interactions.

|                                                     | N   | Length of gestation (weeks) <sup>a</sup> |         |                            | Birthweight (g) <sup>a</sup> |         |                            |
|-----------------------------------------------------|-----|------------------------------------------|---------|----------------------------|------------------------------|---------|----------------------------|
|                                                     |     | $\beta$ (95% CI)                         | p-value | $p_{\text{interaction}}^b$ | $\beta$ (95% CI)             | p-value | $p_{\text{interaction}}^b$ |
| All Mothers                                         |     |                                          |         |                            |                              |         |                            |
| Stratified by <i>PON1</i> <sub>192</sub> Genotype:  |     |                                          |         |                            |                              |         |                            |
| RR (ref)                                            | 55  | -0.3 (-1.2, 0.5)                         | 0.44    | N/A                        | -71 (-384, 242)              | 0.65    | N/A                        |
| QR                                                  | 107 | -0.9 (-1.6, -0.3)                        | <0.01   | 0.04**                     | -454 (-707, -201)            | <0.01   | 0.02**                     |
| QQ                                                  | 111 | -0.5 (-1.1, 0.0)                         | 0.07    | 0.09*                      | -2 (-231, 228)               | 0.99    | 0.76                       |
| Stratified by <i>PON1</i> <sub>-108</sub> Genotype  |     |                                          |         |                            |                              |         |                            |
| CC                                                  | 118 | -0.3 (-0.9, 0.3)                         | 0.32    | N/A                        | -119 (-340, 103)             | 0.29    | N/A                        |
| CT                                                  | 106 | -1.0 (-1.6, -0.4)                        | <0.01   | 0.04**                     | -299 (-520, -78)             | 0.01    | 0.15                       |
| TT                                                  | 46  | -0.1 (-1.0, 0.8)                         | 0.87    | 0.31                       | 85 (-361, 530)               | 0.7     | 0.12                       |
| Black Mothers                                       |     |                                          |         |                            |                              |         |                            |
| Stratified by <i>PON1</i> <sub>192</sub> Genotype:  |     |                                          |         |                            |                              |         |                            |
| RR (ref)                                            | 28  | 0.3 (-1.3, 1.8)                          | 0.74    | N/A                        | 305 (-215, 826)              | 0.23    | N/A                        |
| QR                                                  | 32  | -0.4 (-2.2, 1.3)                         | 0.61    | 0.47                       | -551 (-1058, -44)            | 0.03    | 0.05**                     |
| QQ                                                  | 7   | NA <sup>c</sup>                          |         |                            |                              |         |                            |
| Stratified by <i>PON1</i> <sub>-108</sub> Genotype: |     |                                          |         |                            |                              |         |                            |
| CC                                                  | 52  | 0.1 (-1.0, 1.2)                          | 0.87    | N/A                        | -7 (-337, 323)               | 0.97    | N/A                        |
| CT                                                  | 14  | 0.0 (-1.5, 1.5)                          | 0.98    | 0.97                       | -609 (-1174, -45)            | 0.04    | 0.37                       |
| TT                                                  | 2   | NA <sup>c</sup>                          |         |                            |                              |         |                            |
| White Mothers                                       |     |                                          |         |                            |                              |         |                            |
| Stratified by <i>PON1</i> <sub>192</sub> Genotype:  |     |                                          |         |                            |                              |         |                            |
| RR (ref)                                            | 22  | -0.4 (-2, 1.1)                           | 0.55    | N/A                        | 38 (-693, 769)               | 0.91    | N/A                        |
| QR                                                  | 69  | -0.7 (-1.3, -0.1)                        | 0.03    | 0.05**                     | -344 (-663, -25)             | 0.04    | 0.09*                      |
| QQ                                                  | 96  | -0.5 (-1.0, 0.0)                         | 0.07    | 0.06*                      | 66 (-186, 320)               | 0.6     | 0.58                       |
| Stratified by <i>PON1</i> <sub>-108</sub> Genotype: |     |                                          |         |                            |                              |         |                            |
| CC                                                  | 58  | -0.6 (-1.2, 0.1)                         | 0.08    | N/A                        | -194 (-551, 162)             | 0.28    | N/A                        |
| CT                                                  | 84  | -0.8 (-1.3, -0.2)                        | <0.01   | 0.64                       | -178 (-438, 81)              | 0.17    | 0.75                       |
| TT                                                  | 42  | -0.2 (-1.1, 0.8)                         | 0.73    | 0.09*                      | 129 (-349, 606)              | 0.59    | 0.10*                      |

All  $\Sigma$ DAP concentrations are log<sub>10</sub>-transformed.

<sup>a</sup>Excludes mothers in "other" race category. Adjusted for mother's age, household income, marital status, parity category, log<sub>10</sub>-transformed blood lead, and log<sub>10</sub>-transformed cotinine. Models for all mothers are also adjusted for maternal race.

<sup>b</sup>p-value for *PON1* X  $\Sigma$ DAP interaction term from separate cross-product models.

<sup>c</sup>Not enough mothers in category to produce an effect estimate.

*PON*<sub>192</sub>

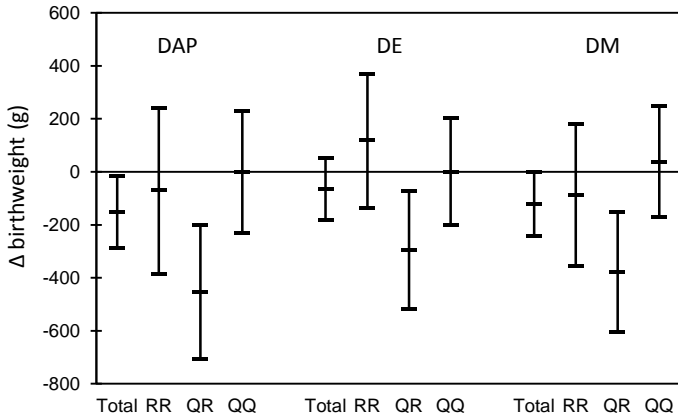

1a) All Mothers (n=306)

*PON*<sub>-108</sub>

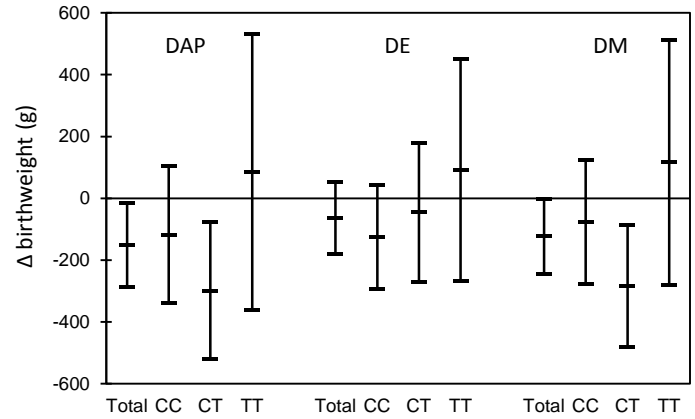

1b) All Mothers (n=306)

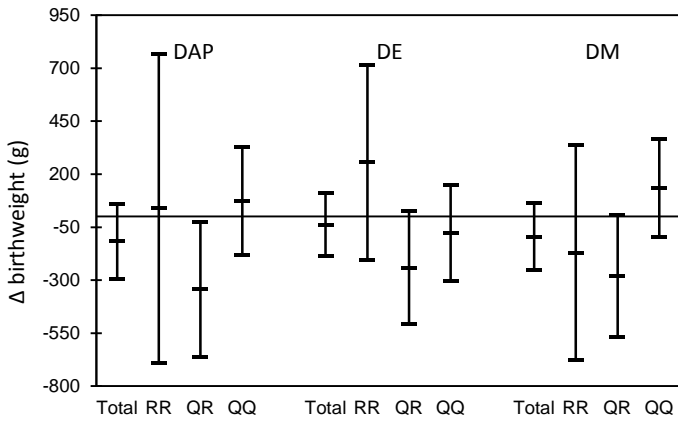

1c) White Mothers (n=213)

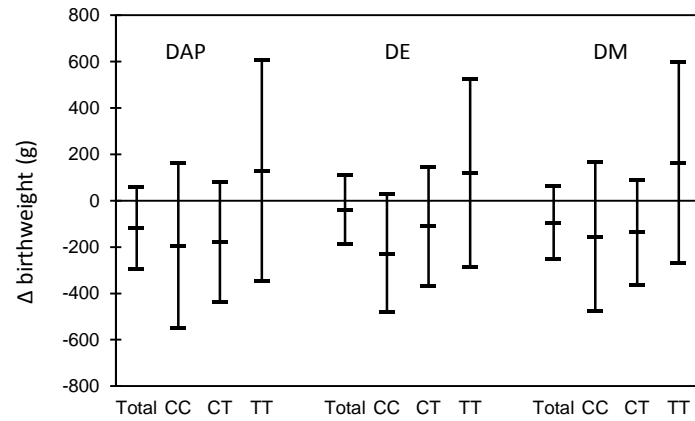

1d) White Mothers (n=213)

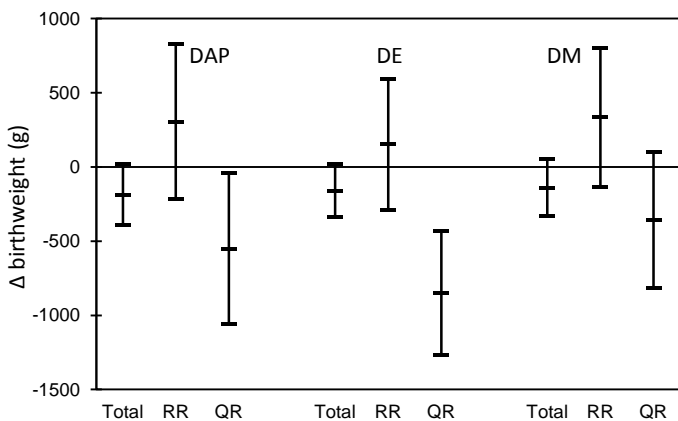

1e) Black Mothers (n=97)

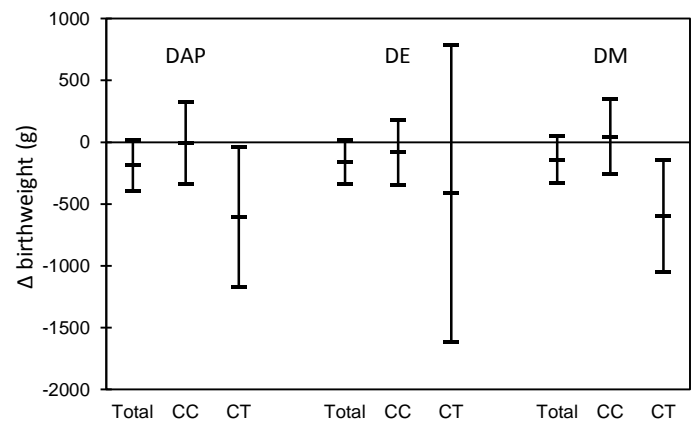

1f) Black Mothers (n=97)

**Supplemental Material, Figure 1:** *PON1*-stratified associations of a 10-fold increase in  $\Sigma$ DAPs,  $\Sigma$ DEs, and  $\Sigma$ DMs with birthweight, for all mothers (1a and 1b), white mothers (1c and 1d), and black mothers (1e and 1f). All models adjusted for mother's age, household income, marital status, parity category, and  $\log_{10}$ -transformed blood lead, and  $\log_{10}$ -transformed cotinine; models for all mothers also adjusted for maternal race. There were not enough infants with black mothers had *PON1*<sub>192QR</sub> (n=7) or *PON1*<sub>-108TT</sub> (n=2) genotype to calculate effect estimates. Error bars denote 95% confidence intervals.

*PON*<sub>192</sub>

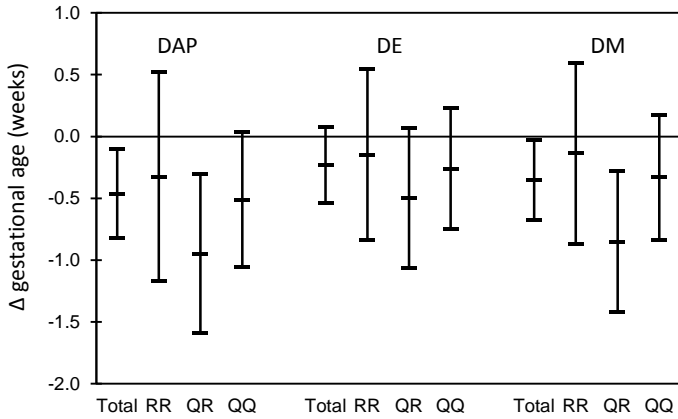

2a) All Mothers (n=306)

*PON*<sub>-108</sub>

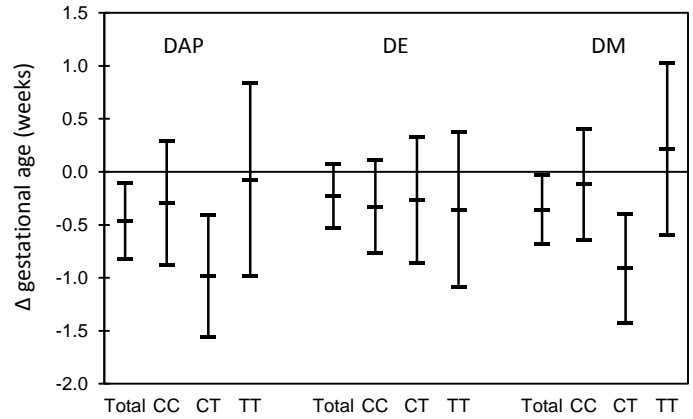

2b) All Mothers (n=306)

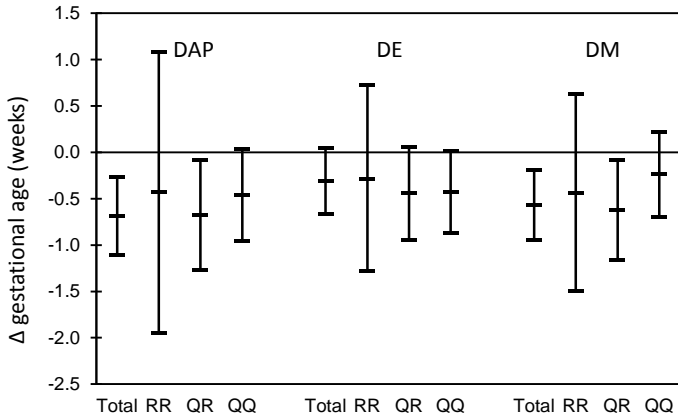

2c) White Mothers (n=213)

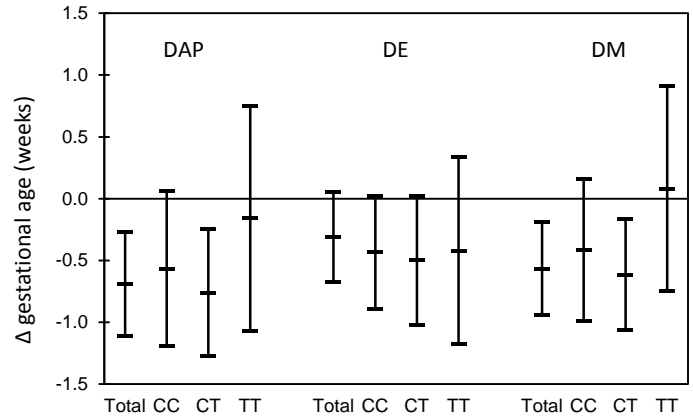

2d) White Mothers (n=213)

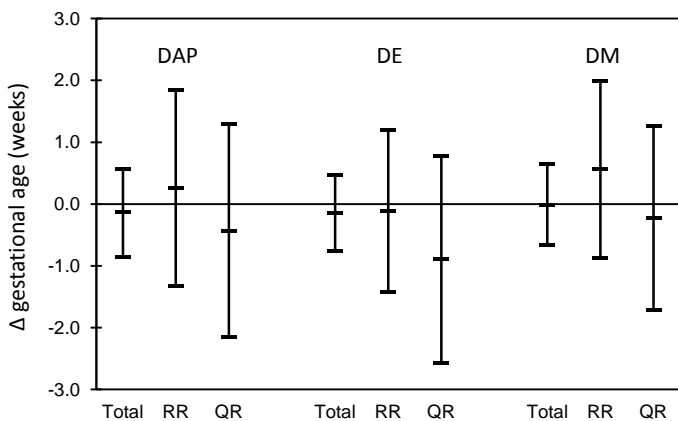

2e) Black Mothers (n=97)

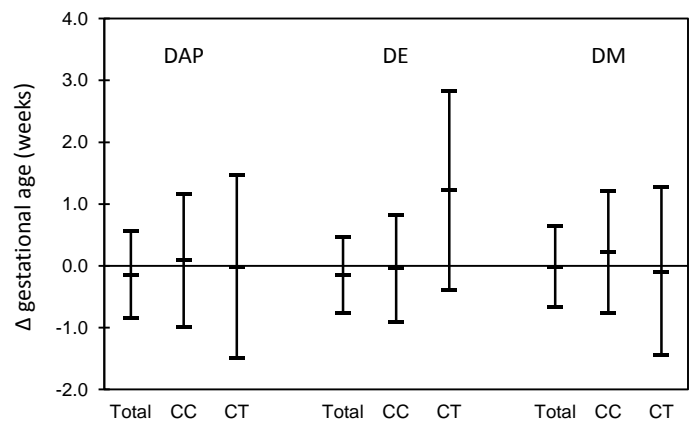

2f) Black Mothers (n=97)

**Supplemental Material, Figure 2:** *PON1*-stratified associations of a 10-fold increase in  $\Sigma$ DAPs,  $\Sigma$ DEs, and  $\Sigma$ DMs with length of gestation, for all mothers (2a and 2b), white mothers (2c and 2d), and black mothers (2e and 2f). All models adjusted for mother's age, household income, marital status, parity category, and  $\log_{10}$ -transformed blood lead, and  $\log_{10}$ -transformed cotinine; models for all mothers also adjusted for maternal race. There were not enough infants with black mothers had *PON1*<sub>192QR</sub> (n=7) or *PON1*<sub>-108TT</sub> (n=2) genotype to calculate effect estimates. Error bars denote 95% confidence intervals.
